# Supplementary material for: Acid-Sensing Ion Channels Immunoreactivity in Nerve Profiles and Glomus Cells of the Human Carotid Body
Source: Preprints.org preprint supplement (doi:10.20944/preprints202311.1166.v1), 2023-11-20
Supplement: Supplementary file 1 [file supplementary]

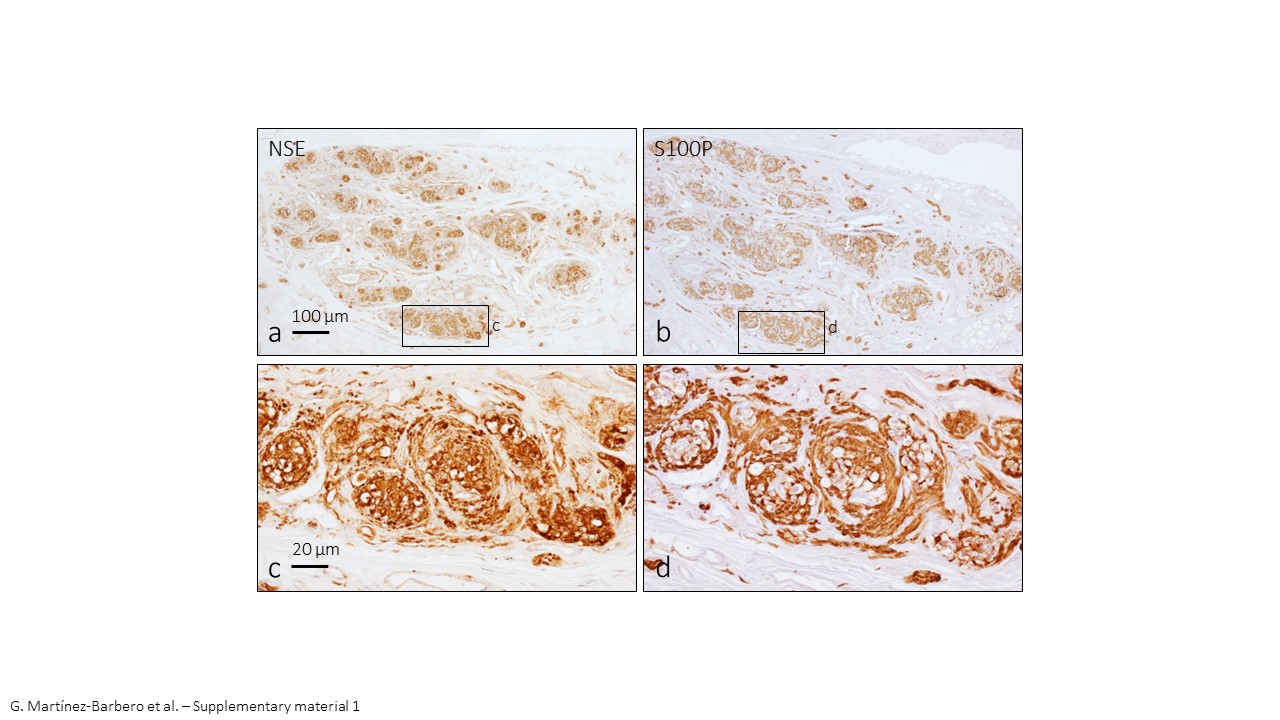


**Figure Supplementary 1**.- Immunohistochemical identification of type I glomus cells (a-c) and type II glomus cells (b-d) in the human carotid body. NSE: neuron-specific enolase; S100P: S100 protein.


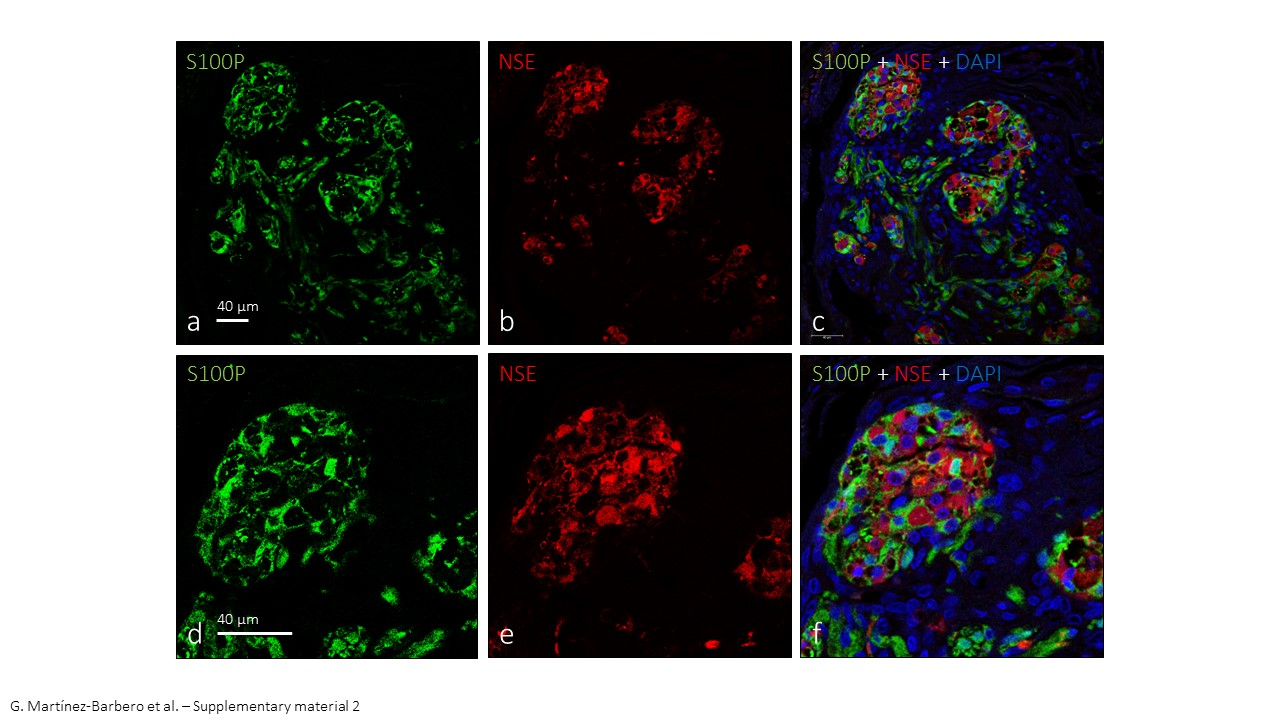


**Figure Supplementary 2.- Identification of glomus cell types using immunofluorescence for NSE and S100P.** The type I glomus cells displayed a strong immunofluorescence for neurons specific enolase (NSE, red fluorescence) while type II glomus cells were intensely immunolabelled by S100 protein (S100P, green fluorescence. Lens 60/1.25 oil; pinhole resolution 1.XY 156 nm and resolution Z 334 nm.


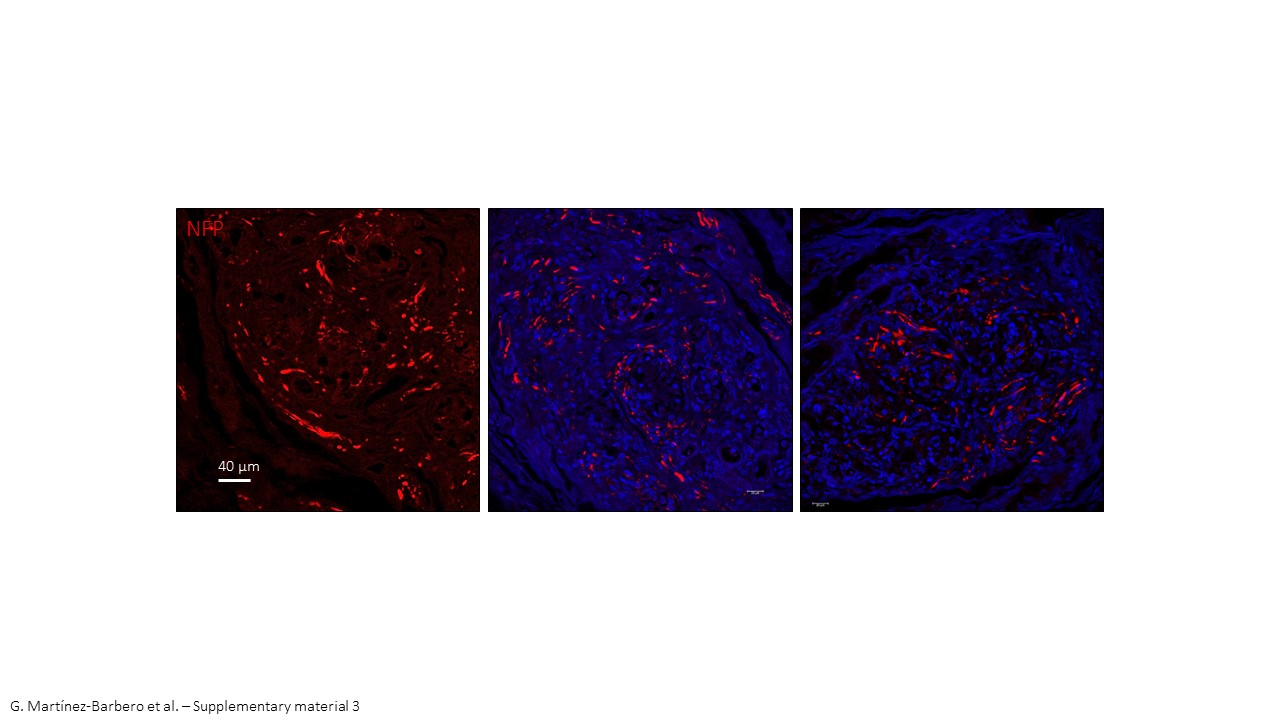


**Figure Supplementary 3**.- Distribution of nerve profiles in sections of the human carotid body immunolabelled for neurofilament proteins (NFP) Lens 60/1.25 oil; pinhole resolution 1.XY 156 nm and resolution Z 334 nm.


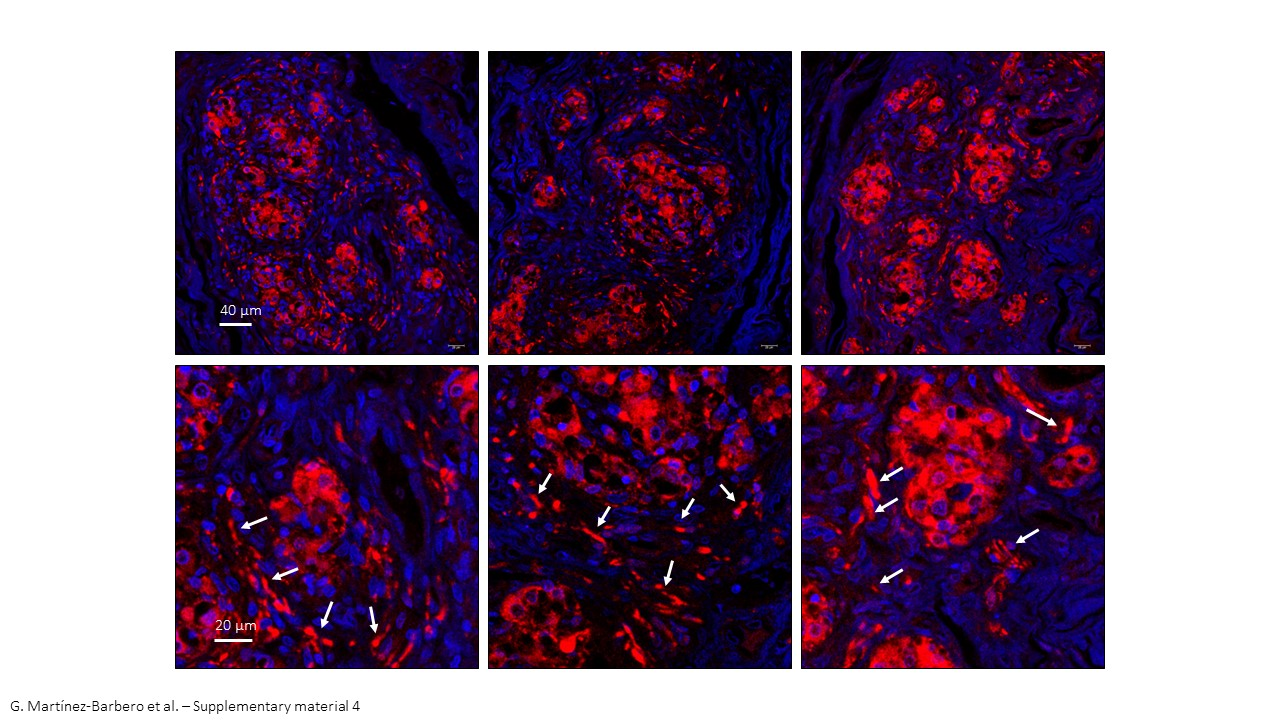


**Figure Supplementary 4**.- Identification of type I glomus cells and nerve profiles (white arrows) in the human carotid body immunolabelled for neuron specific enolase (NSE). Lens 60/1.25 oil; pinhole resolution 1.XY 156 nm and resolution Z 334 nm.
